# Supplementary material for: Psychometric validation of the Japanese version of Alcohol Quality of Life Scale (AQoLS-Japan) in the treatment of patients with alcohol use disorder
Source: Springer Nature journal article supplement (doi:10.1007/s11136-019-02310-w), 2019-10-04
Supplement: MOESM1 [file 17243822]

**Psychometric validation of the Japanese version of Alcohol Quality of Life Scale (AQoLS-Japan) in the treatment of patients with alcohol use disorder**

Susumu Higuchi MD, PhD, Yoshiya Moriguchi MD, PhD, Kristin Hui Xian Tan, MPH

**Corresponding author:** Professor Susumu Higuchi, Director, National Hospital Organization Kurihama Medical and Addiction Center, 5-3-1 Nobi, Yokosuka, Kanagawa, 239-0841, Japan

[h-susumu@db3.so-net.ne.jp](mailto:h-susumu@db3.so-net.ne.jp)

**Table e1. AQoLS UK Version**

Over the last 4 weeks this has applied to me ...Not at all/A little/Quite a lot/Very much

|    |                                                                                                                          |
|----|--------------------------------------------------------------------------------------------------------------------------|
| 1  | I have felt I miss out on everyday activities with family and friends                                                    |
| 2  | It has been difficult for me to follow through on plans                                                                  |
| 3  | I have been restricted in the places I can go because of alcohol                                                         |
| 4  | I have struggled doing physical activities due to alcohol (e.g. DIY, walking, cycling)                                   |
| 5  | It has been too much effort to do jobs around the house due to alcohol (e.g. cleaning, gardening, maintaining the house) |
| 6  | Alcohol has interfered with my ability to work                                                                           |
| 7  | I have cut myself off from other people                                                                                  |
| 8  | I have neglected the people close to me                                                                                  |
| 9  | Alcohol has damaged my close relationships                                                                               |
| 10 | I have behaved badly towards other people                                                                                |
| 11 | I have felt I miss out on family life because of alcohol                                                                 |
| 12 | I have felt that people have no trust in me                                                                              |
| 13 | Alcohol has interfered with my sex life                                                                                  |
| 14 | Alcohol has interfered with my relationships with friends                                                                |
| 15 | I have struggled to keep on top of my everyday household affairs (e.g. dealing with mail, organizing appointments)       |
| 16 | Alcohol has had a negative effect on my housing situation                                                                |
| 17 | All my money has gone on alcohol                                                                                         |
| 18 | Alcohol has caused me financial difficulties                                                                             |
| 19 | I have felt ashamed of myself                                                                                            |
| 20 | I have felt that people look down on me                                                                                  |
| 21 | I have felt that I am wasting my life                                                                                    |
| 22 | I have worried about the effect alcohol has been having on my health                                                     |
| 23 | I have worried about alcohol causing problems in my life                                                                 |
| 24 | I have had no appetite                                                                                                   |
| 25 | I have neglected my appearance                                                                                           |
| 26 | I have neglected my general health                                                                                       |
| 27 | I have put myself in risky situations                                                                                    |
| 28 | I have felt that nothing matters more than alcohol                                                                       |
| 29 | Alcohol has controlled me                                                                                                |
| 30 | My life has revolved around alcohol                                                                                      |
| 31 | I have planned my days around alcohol                                                                                    |
| 32 | I have felt as though I have not been in control of myself                                                               |
| 33 | I have not had a good night's sleep                                                                                      |
| 34 | I have not been getting enough sleep                                                                                     |

**Table e2 Baseline characteristics by Drinking Risk Level (DRL)**

|                                                                                    | <b>Low or medium<br/>DRL (N=117)</b> | <b>High or very<br/>high DRL<br/>(N=33)</b> |
|------------------------------------------------------------------------------------|--------------------------------------|---------------------------------------------|
| Sex; n (%)                                                                         |                                      |                                             |
| Male                                                                               | 97 (82.9%)                           | 26 (78.8%)                                  |
| Female                                                                             | 20 (17.1%)                           | 7 (21.2%)                                   |
| Age (years); mean (SD)                                                             | 53.3 (12.7)                          | 51.3 (10.0)                                 |
| Living status; n (%)                                                               |                                      |                                             |
| Alone                                                                              | 44 (37.6%)                           | 14 (42.4%)                                  |
| Not alone                                                                          | 73 (62.4%)                           | 19 (57.6%)                                  |
| Employment status; n (%)                                                           |                                      |                                             |
| On a job                                                                           | 44 (37.6%)                           | 18 (54.5%)                                  |
| Working at home                                                                    | 3 (2.6%)                             | 3 (9.1%)                                    |
| Retired                                                                            | 14 (12.0%)                           | 4 (12.1%)                                   |
| No job                                                                             | 56 (47.9%)                           | 8 (24.2%)                                   |
| Current smoker; n (%)                                                              | 80 (69.0%)                           | 20 (60.6%)                                  |
| Alcohol use disorder; n (%)                                                        |                                      |                                             |
| Abuse                                                                              | 4 (3.4%)                             | 0 (0.0%)                                    |
| Dependence                                                                         | 113 (96.6%)                          | 33 (100.0%)                                 |
| Total alcohol consumption (g/day) over 28 days;<br>mean (SD)                       | 15.8 (18.6)                          | 112.5 (44.3)                                |
| Number of drinking days; mean (SD)                                                 | 8.4 (10.0)                           | 23.8 (5.0)                                  |
| Number of heavy drinking days; mean (SD)                                           | 4.4 (7.4)                            | 23.1 (5.4)                                  |
| Age at onset of drinking problem (years); mean<br>(SD)                             | 38.4 (13.9)                          | 41.2 (12.6)                                 |
| Time since diagnosis (years); mean (SD)                                            | 4.2 (5.4)                            | 2.3 (5.1)                                   |
| Number of previous attempts to abstain or reduce<br>alcohol consumption; mean (SD) | 9.9 (21.9)                           | 4.7 (5.9)                                   |
| Comorbidities; n (%)                                                               |                                      |                                             |
| Cardiovascular                                                                     | 26 (22.2%)                           | 7 (21.2%)                                   |
| Gastric                                                                            | 24 (20.5%)                           | 4 (12.1%)                                   |
| Hepatic                                                                            | 49 (41.9%)                           | 15 (45.5%)                                  |
| Metabolic                                                                          | 23 (19.7%)                           | 4 (12.1%)                                   |
| Psychiatric                                                                        | 44 (37.6%)                           | 11 (33.3%)                                  |

**Table e3 Generic quality of life measures at Baseline and follow-up visits**

|                                                         |                                                     | <b>Baseline (n=150)</b> | <b>Week 2 (n=145)</b> | <b>Month 3 (n=133)</b> |
|---------------------------------------------------------|-----------------------------------------------------|-------------------------|-----------------------|------------------------|
| <b>EQ-5D-3L Mobility</b>                                | I have no problems in walking about                 | 118 (80.3%)             | 123 (86.6%)           | 110 (85.9%)            |
|                                                         | I have some problems in walking about               | 26 (17.7%)              | 17 (12.0%)            | 18 (14.1%)             |
|                                                         | I am confined to bed                                | 3 (2.0%)                | 2 (1.4%)              | 0 (0.0%)               |
|                                                         | Missing (n)                                         | 3                       | 3                     | 5                      |
| <b>EQ-5D-3L Self-care</b>                               | I have no problems with self-care                   | 129 (87.2%)             | 134 (93.1%)           | 124 (95.4%)            |
|                                                         | I have some problems washing/dressing myself        | 19 (12.8%)              | 10 (6.9%)             | 5 (3.8%)               |
|                                                         | I am unable to wash or dress myself                 | 0 (0.0%)                | 0 (0.0%)              | 1 (0.8%)               |
|                                                         | Missing (n)                                         | 2                       | 1                     | 3                      |
| <b>EQ-5D-3L Usual activities</b>                        | I have no problems performing my usual activities   | 110 (74.3%)             | 114 (79.7%)           | 111 (84.1%)            |
|                                                         | I have some problems performing my usual activities | 31 (20.9%)              | 25 (17.5%)            | 19 (14.4%)             |
|                                                         | I am unable to perform my usual activities          | 7 (4.7%)                | 4 (2.8%)              | 2 (1.5%)               |
|                                                         | Missing (n)                                         | 2                       | 2                     | 1                      |
| <b>EQ-5D-3L Pain/discomfort</b>                         | I have no pain or discomfort                        | 91 (62.3%)              | 86 (59.7%)            | 87 (66.9%)             |
|                                                         | I have moderate pain or discomfort                  | 48 (32.9%)              | 50 (34.7%)            | 36 (27.7%)             |
|                                                         | I have extreme pain or discomfort                   | 7 (4.8%)                | 8 (5.6%)              | 7 (5.4%)               |
|                                                         | Missing (n)                                         | 4                       | 1                     | 3                      |
| <b>EQ-5D-3L Anxiety/depression</b>                      | I am not anxious or depressed                       | 84 (57.1%)              | 88 (61.1%)            | 94 (71.8%)             |
|                                                         | I am moderately anxious or depressed                | 53 (36.1%)              | 48 (33.3%)            | 34 (26.0%)             |
|                                                         | I am extremely anxious or depressed                 | 10 (6.8%)               | 8 (5.6%)              | 3 (2.3%)               |
|                                                         | Missing (n)                                         | 3                       | 1                     | 2                      |
| <b>Score in VAS</b>                                     | Mean (SD)                                           | 68.5 (20.3)             | 70.4 (21.0)           | 75.3 (18.7)            |
|                                                         | Median (Q1-Q3)                                      | 70.0 [60.0-81.5]        | 75.0 [60.0-82.0]      | 80.0 [70.0-90.0]       |
|                                                         | Range                                               | (8.0, 100.0)            | (7.0, 100.0)          | (10.0, 100.0)          |
|                                                         | Missing (n)                                         | 9                       | 11                    | 6                      |
| <b>EQ-5D-3L index value</b>                             | Mean (SD)                                           | 0.8 (0.2)               | 0.8 (0.2)             | 0.8 (0.2)              |
|                                                         | Median (Q1-Q3)                                      | 0.8 [0.7-1.0]           | 0.8 [0.7-1.0]         | 0.8 [0.7-1.0]          |
|                                                         | Range                                               | (0.1, 1.0)              | (0.2, 1.0)            | (0.2, 1.0)             |
|                                                         | Missing (n)                                         | 5                       | 4                     | 7                      |
| <b>SF-36: Physical functioning</b>                      | Mean (SD)                                           | 85.7 (16.3)             | 84.4 (18.2)           | 86.6 (16.0)            |
|                                                         | Median (Q1-Q3)                                      | 90.0 [80.0-95.0]        | 90.0 [75.0-95.0]      | 90.0 [80.0-100.0]      |
|                                                         | Range                                               | (10.0, 100.0)           | (15.0, 100.0)         | (35.0, 100.0)          |
|                                                         | Missing (n)                                         | 0                       | 0                     | 3                      |
| <b>SF-36: Role limitation due to physical health</b>    | Mean (SD)                                           | 73.3 (26.3)             | 73.0 (25.4)           | 77.3 (24.5)            |
|                                                         | Median (Q1-Q3)                                      | 75.0 [56.3-100.0]       | 75.0 [50.0-100.0]     | 87.5 [58.3-100.0]      |
|                                                         | Range                                               | (0.0, 100.0)            | (0.0, 100.0)          | (0.0, 100.0)           |
|                                                         | Missing (n)                                         | 0                       | 0                     | 3                      |
| <b>SF-36: Role limitation due to emotional problems</b> | Mean (SD)                                           | 72.0 (26.6)             | 71.7 (28.1)           | 78.1 (25.6)            |
|                                                         | Median (Q1-Q3)                                      | 75.0 [58.3-100.0]       | 75.0 [50.0-100.0]     | 91.7 [58.3-100.0]      |
|                                                         | Range                                               | (0.0, 100.0)            | (0.0, 100.0)          | (0.0, 100.0)           |
|                                                         | Missing (n)                                         | 0                       | 0                     | 3                      |
| <b>SF-36: Vitality</b>                                  | Mean (SD)                                           | 58.4 (20.8)             | 57.2 (24.0)           | 64.1 (20.3)            |
|                                                         | Median (Q1-Q3)                                      | 56.3 [50.0-75.0]        | 56.3 [43.8-75.0]      | 68.8 [50.0-81.3]       |
|                                                         | Range                                               | (0.0, 100.0)            | (0.0, 100.0)          | (0.0, 100.0)           |
|                                                         | Missing (n)                                         | 1                       | 0                     | 2                      |
| <b>SF-36: Mental health</b>                             | Mean (SD)                                           | 63.0 (21.7)             | 62.6 (22.2)           | 68.1 (21.3)            |
|                                                         | Median (Q1-Q3)                                      | 65.0 [50.0-80.0]        | 70.0 [45.0-80.0]      | 70.0 [55.0-85.0]       |
|                                                         | Range                                               | (5.0, 100.0)            | (0.0, 100.0)          | (10.0, 100.0)          |
|                                                         | Missing (n)                                         | 1                       | 0                     | 2                      |
| <b>SF-36: Social functioning</b>                        | Mean (SD)                                           | 74.5 (27.2)             | 73.7 (26.4)           | 78.5 (26.0)            |
|                                                         | Median (Q1-Q3)                                      | 75.0 [50.0-100.0]       | 75.0 [50.0-100.0]     | 87.5 [62.5-100.0]      |
|                                                         | Range                                               | (0.0, 100.0)            | (12.5, 100.0)         | (0.0, 100.0)           |
|                                                         | Missing (n)                                         | 1                       | 0                     | 1                      |

|                              |                                                     |                                                       |                                                      |                                                        |
|------------------------------|-----------------------------------------------------|-------------------------------------------------------|------------------------------------------------------|--------------------------------------------------------|
| <b>SF-36: Pain</b>           | Mean (SD)<br>Median (Q1-Q3)<br>Range<br>Missing (n) | 68.2 (25.1)<br>72.0 [46.5-92.0]<br>(0.0, 100.0)<br>1  | 67.7 (25.7)<br>72.0 [52.0-84.0]<br>(0.0, 100.0)<br>0 | 68.8 (26.4)<br>72.0 [52.0-100.0]<br>(10.0, 100.0)<br>2 |
| <b>SF-36: General health</b> | Mean (SD)<br>Median (Q1-Q3)<br>Range<br>Missing (n) | 55.1 (17.4)<br>56.0 [45.0-67.0]<br>(10.0, 100.0)<br>1 | 54.6 (18.5)<br>57.0 [45.0-67.0]<br>(0.0, 100.0)<br>1 | 58.0 (20.2)<br>57.0 [47.0-72.0]<br>(0.0, 100.0)<br>3   |

**Table e4. Confirmatory factor analysis: AQoLS interfactor correlations (SE) at Baseline and Week 2**

| AQoLS Dimension   |          | Activities  | Relationships | Living Conditions | Negative Emotions | Control     | Sleep       | Self-esteem |
|-------------------|----------|-------------|---------------|-------------------|-------------------|-------------|-------------|-------------|
| Activities        | Baseline | 1.00 (-)    |               |                   |                   |             |             |             |
| Relationships     | Baseline | 0.90 (0.02) | 1.00 (-)      |                   |                   |             |             |             |
| Living Conditions | Baseline | 0.80 (0.04) | 0.86 (0.04)   | 1.00 (-)          |                   |             |             |             |
| Negative Emotions | Baseline | 0.84 (0.03) | 0.79 (0.04)   | 0.68 (0.06)       | 1.00 (-)          |             |             |             |
| Control           | Baseline | 0.88 (0.02) | 0.84 (0.03)   | 0.76 (0.05)       | 0.78 (0.05)       | 1.00 (-)    |             |             |
| Sleep             | Baseline | 0.53 (0.06) | 0.52 (0.07)   | 0.51 (0.06)       | 0.52 (0.08)       | 0.52 (0.07) | 1.00 (-)    |             |
| Self-esteem       | Baseline | 0.84 (0.03) | 0.97 (0.02)   | 0.79 (0.04)       | 0.85 (0.04)       | 0.80 (0.04) | 0.42 (0.07) | 1.00 (-)    |

# アルコール クオリティ・オブ・ライフ スケール (AQoLS)

## 指示をよく読んでください

本アンケートの目的は、過去4週間に、アルコールが及ぼした影響の程度を調べることです。過去4週間より前のことは回答しないでください。

ここでいう「アルコール」とは、過去4週間におけるアルコールとの全般的な関わりであって、その間飲酒していたかどうかは問いません。

各質問に対し、最も当てはまる回答を選んでください。

過去4週間に当てはまる回答...

全くない    少し    かなり    非常に

|                                                            |                          |                          |                          |                          |
|------------------------------------------------------------|--------------------------|--------------------------|--------------------------|--------------------------|
| 1. 家族や友人との日常的な活動の機会を逸していると感じていた                            | <input type="checkbox"/> | <input type="checkbox"/> | <input type="checkbox"/> | <input type="checkbox"/> |
| 2. 予定されていた計画を、最後までやり通すのは困難であった                             | <input type="checkbox"/> | <input type="checkbox"/> | <input type="checkbox"/> | <input type="checkbox"/> |
| 3. アルコールのせいで、出かけられる場所が限られていた                               | <input type="checkbox"/> | <input type="checkbox"/> | <input type="checkbox"/> | <input type="checkbox"/> |
| 4. アルコールのせいで、身体的な活動が困難であった<br>(例：日曜大工、散歩、運動)               | <input type="checkbox"/> | <input type="checkbox"/> | <input type="checkbox"/> | <input type="checkbox"/> |
| 5. アルコールのせいで、家の周りの事をするのに大変な努力を要していた (例：掃除、ガーデニング、家のメンテナンス) | <input type="checkbox"/> | <input type="checkbox"/> | <input type="checkbox"/> | <input type="checkbox"/> |
| 6. アルコールのせいで、仕事をする能力に支障が出ていた                               | <input type="checkbox"/> | <input type="checkbox"/> | <input type="checkbox"/> | <input type="checkbox"/> |

裏返してください

過去4週間についてのみ回答してください。

過去4週間に当てはまる回答...

全くない 少し かなり 非常に

|                               |                          |                          |                          |                          |
|-------------------------------|--------------------------|--------------------------|--------------------------|--------------------------|
| 7. 他の人との繋がりを断ち切っていた           | <input type="checkbox"/> | <input type="checkbox"/> | <input type="checkbox"/> | <input type="checkbox"/> |
| 8. 親しい人をおろそかにしていた             | <input type="checkbox"/> | <input type="checkbox"/> | <input type="checkbox"/> | <input type="checkbox"/> |
| 9. アルコールのせいで、身内との人間関係が損なわれていた | <input type="checkbox"/> | <input type="checkbox"/> | <input type="checkbox"/> | <input type="checkbox"/> |
| 10. 他の人に対して、ひどい態度を取ってしまっていた   | <input type="checkbox"/> | <input type="checkbox"/> | <input type="checkbox"/> | <input type="checkbox"/> |

過去4週間に当てはまる回答...

全くない 少し かなり 非常に

|                                   |                          |                          |                          |                          |
|-----------------------------------|--------------------------|--------------------------|--------------------------|--------------------------|
| 11. アルコールのせいで、家庭生活の機会を逸していると感じていた | <input type="checkbox"/> | <input type="checkbox"/> | <input type="checkbox"/> | <input type="checkbox"/> |
| 12. 人に信用されていないと感じていた              | <input type="checkbox"/> | <input type="checkbox"/> | <input type="checkbox"/> | <input type="checkbox"/> |
| 13. アルコールのせいで、性生活に支障が出ていた         | <input type="checkbox"/> | <input type="checkbox"/> | <input type="checkbox"/> | <input type="checkbox"/> |
| 14. アルコールのせいで、友人との関係に支障が出ていた      | <input type="checkbox"/> | <input type="checkbox"/> | <input type="checkbox"/> | <input type="checkbox"/> |

裏返してください

過去4週間についてのみ回答してください。

過去4週間に当てはまる回答...

全くない 少し かなり 非常に

|                                                   |                          |                          |                          |                          |
|---------------------------------------------------|--------------------------|--------------------------|--------------------------|--------------------------|
| 15. 日常の家事を適切にこなし続けることが困難であった<br>(例：郵便物の処理、請求への支払) | <input type="checkbox"/> | <input type="checkbox"/> | <input type="checkbox"/> | <input type="checkbox"/> |
| 16. アルコールのせいで、住宅事情に悪影響があった<br>(例：立ち退き、実家に転居)      | <input type="checkbox"/> | <input type="checkbox"/> | <input type="checkbox"/> | <input type="checkbox"/> |
| 17. 自分のお金を全て、アルコールに使ってしまった                        | <input type="checkbox"/> | <input type="checkbox"/> | <input type="checkbox"/> | <input type="checkbox"/> |
| 18. アルコールのせいで、財政難に陥った                             | <input type="checkbox"/> | <input type="checkbox"/> | <input type="checkbox"/> | <input type="checkbox"/> |

過去4週間に当てはまる回答...

全くない 少し かなり 非常に

|                                |                          |                          |                          |                          |
|--------------------------------|--------------------------|--------------------------|--------------------------|--------------------------|
| 19. 自分を恥ずかしく感じていた              | <input type="checkbox"/> | <input type="checkbox"/> | <input type="checkbox"/> | <input type="checkbox"/> |
| 20. 人に見下されていると感じていた            | <input type="checkbox"/> | <input type="checkbox"/> | <input type="checkbox"/> | <input type="checkbox"/> |
| 21. 人生を無駄にしていると感じていた           | <input type="checkbox"/> | <input type="checkbox"/> | <input type="checkbox"/> | <input type="checkbox"/> |
| 22. アルコールによる健康への影響が心配であった      | <input type="checkbox"/> | <input type="checkbox"/> | <input type="checkbox"/> | <input type="checkbox"/> |
| 23. 生活に問題を引き起こすアルコールのことが心配であった | <input type="checkbox"/> | <input type="checkbox"/> | <input type="checkbox"/> | <input type="checkbox"/> |

裏返してください

過去4週間についてのみ回答してください。

過去4週間に当てはまる回答...

全くない 少し かなり 非常に

|                                           |                          |                          |                          |                          |
|-------------------------------------------|--------------------------|--------------------------|--------------------------|--------------------------|
| 24. 食欲が無かった                               | <input type="checkbox"/> | <input type="checkbox"/> | <input type="checkbox"/> | <input type="checkbox"/> |
| 25. 外見をおろそかにしていた                          | <input type="checkbox"/> | <input type="checkbox"/> | <input type="checkbox"/> | <input type="checkbox"/> |
| 26. 自分の健康全般をおろそかにしていた                     | <input type="checkbox"/> | <input type="checkbox"/> | <input type="checkbox"/> | <input type="checkbox"/> |
| 27. 危険な状況に身を置いていた（例：事故、けんか、法的トラブルに巻き込まれる） | <input type="checkbox"/> | <input type="checkbox"/> | <input type="checkbox"/> | <input type="checkbox"/> |

過去4週間に当てはまる回答...

全くない 少し かなり 非常に

|                            |                          |                          |                          |                          |
|----------------------------|--------------------------|--------------------------|--------------------------|--------------------------|
| 28. アルコールよりも大事なことはないと感じていた | <input type="checkbox"/> | <input type="checkbox"/> | <input type="checkbox"/> | <input type="checkbox"/> |
| 29. アルコールに支配されていた          | <input type="checkbox"/> | <input type="checkbox"/> | <input type="checkbox"/> | <input type="checkbox"/> |
| 30. 生活はアルコール中心に回っていた       | <input type="checkbox"/> | <input type="checkbox"/> | <input type="checkbox"/> | <input type="checkbox"/> |
| 31. アルコール中心に日々の計画を立ててきた    | <input type="checkbox"/> | <input type="checkbox"/> | <input type="checkbox"/> | <input type="checkbox"/> |
| 32. 自分をコントロールできていないと感じていた  | <input type="checkbox"/> | <input type="checkbox"/> | <input type="checkbox"/> | <input type="checkbox"/> |

裏返してください



過去4週間についてのみ回答してください。

過去4週間に当てはまる回答...

全くない 少し かなり 非常に

---

33. 夜良く眠ることができていなかった

---

34. 十分な時間睡眠が取れていなかった

---

アンケートにご協力いただきありがとうございます。

最初に戻って、各ページのすべての質問に回答していることを確認してください。
